# Supplementary material for: Rubber Voice Illusion exposed neural correlates of voice perception and vocal adaptation across the Continuum of Psychosis
Source: Research Square preprint supplement (doi:10.21203/rs.3.rs-7255973/v1), 2025-09-25

# Rubber Voice Illusion exposed neural correlates of voice perception and vocal adaptation across the Continuum of Psychosis

Suong Welp<sup>1,2\*</sup>, Andrea Hildelbrandt<sup>1,3</sup>, David A. Magezi<sup>4</sup>, Martin Voss<sup>5</sup>, and Laura Kaltwasser<sup>6</sup>

<sup>1</sup>Department of Psychology, Carl von Ossietzky Universität Oldenburg, Oldenburg, 26129, Germany

<sup>2</sup>Max Planck Institute for Human Cognitive and Brain Sciences, Leipzig, 04103, Germany

<sup>3</sup>Cluster of Excellence Hearing4all, Carl von Ossietzky Universität Oldenburg, Oldenburg, Germany

<sup>4</sup>Biological Psychology and Neuropsychology, University of Hamburg, Hamburg, 20146, Germany

<sup>5</sup>Department of Psychiatry and Psychotherapy (Charité Campus Mitte), Charité University Medicine and St. Hedwig Hospital, Berlin, 10115, Germany

<sup>6</sup>Humboldt-Universität zu Berlin, Berlin School of Mind and Brain, Berlin, 10117, Germany

\*welp@cbs.mpg.de

+these authors contributed equally to this work

## Supplementary

### Supplementary Figure S1. Voice Perception Questionnaire (German version, translation below)

Participants rated their agreement with seven statements about the voice they heard through headphones, using a visual analog scale ranging from "gar nicht" (not at all, coded as -3) to "vollkommen" (completely, coded as +3), with "weder noch" (neither nor, coded as 0) as the midpoint. The questions indexed perceived Agency (e.g., control over pitch or source), Ownership (e.g., whether the voice felt like their own or a modified version), and localization of the voice.

**Fragebogen zur Stimmwahrnehmung**

VP-Nummer  Con  Block

Bitte beantworten Sie die folgenden Fragen. Verschieben Sie hierbei den Pfeil auf der Linie, um Ihre Zustimmung zwischen "Stimme gar nicht zu" und "Stimme vollkommen zu" zum Ausdruck zu bringen.

**Die Frage beziehen sich auf die Laute, die vom Kopfhörer kommen.**

Frage 1: Ich hatte das Gefühl, als würde ich die Laute aussprechen, die ich gehört habe.

gar nicht | weder noch | vollkommen

Frage 2: Ich hatte das Gefühl, als wäre die Stimme, die ich hörte, meine eigene Stimme.

gar nicht | weder noch | vollkommen

Frage 3: Ich hatte das Gefühl, dass die Stimme, die ich hörte, eine modifizierte Version meiner eigenen Stimme war.

gar nicht | weder noch | vollkommen

Frage 4: Ich hatte das Gefühl, dass die Stimme, die ich hörte, von irgendwoher im Raum kam.

gar nicht | weder noch | vollkommen

Frage 5: Ich hatte das Gefühl, als würde die Stimme, die ich hörte, aus meinem Kopf kommen.

gar nicht | weder noch | vollkommen

Frage 6: Ich fühlte mich, als ob ich die Kontrolle über die Tonhöhe meiner Stimme hatte.

gar nicht | weder noch | vollkommen

Frage 7: Ich hatte das Gefühl, als hätte ich die Kontrolle darüber, woher meine Stimme kam.

gar nicht | weder noch | vollkommen

**SPEICHERN**

## 22 Translation

23 Please answer the following questions. Move the arrow along the line to express your agreement from “not at all” to  
24 “completely.”

25 The questions refer to the sounds coming from the headphones.

Question 1 I had the feeling that I was speaking the sounds that I heard.

Question 2 I had the feeling that the voice I heard was my own voice.

Question 3 I had the feeling that the voice I heard was a modified version of my own voice.

Question 4 I had the feeling that the voice I heard was coming from somewhere in the room.

Question 5 I had the feeling that the voice I heard was coming from inside my own head.

Question 6 I felt as if I had control over the pitch of my voice.

Question 7 I had the feeling that I had control over where my voice was coming from.

26

27 **Supplementary Table S2.** Participant demographics and questionnaire scores by schizotypy group (SPQ and PDI  
28 cutoffs).

29 Displayed are the means, standard deviations (in brackets), and medians for age, gender distribution, and total scores  
30 on the Schizotypal Personality Questionnaire (SPQ) and Peters et al. Delusions Inventory (PDI), separated by  
31 different grouping (SPQ cutoff vs. PDI cutoff). Gender is shown as female/male count.

| Variable            | All participants |            | SPQ Cutoff   |      |                 |      | PDI Cutoff  |    |                 |    |
|---------------------|------------------|------------|--------------|------|-----------------|------|-------------|----|-----------------|----|
|                     | <i>M (SD)</i>    | <i>Mdn</i> | control      |      | high schizotypy |      | control     |    | high schizotypy |    |
| Age                 | 24.77 (3.61)     | 24         | 24.91 (3.46) | 24.5 | 24.61 (3.83)    | 23.5 | 24.8 (3.53) | 24 | 24.7 (3.74)     | 24 |
| Gender(female/male) | 42/18            |            | 23/9         |      | 19/9            |      | 20/9        |    | 22/9            |    |
| PDI score total     | 4.98 (3.61)      | 5          | 3.38 (2.72)  | 3    | 6.82 (3.67)     | 6.5  | 2 (1.22)    | 2  | 7.77 (2.77)     | 7  |
| SPQ score total     | 21.88 (12.89)    | 20         | 12.47 (6.19) | 14   | 32.64 (9.69)    | 29.5 | 14.8 (9.41) | 14 | 28.5 (12.3)     | 27 |

32 Note. *M* = Mean, *Mdn* = Median, *SD* = Standard Deviation; m = male; f = female; SPQ = Schizotypal Personality Questionnaire; PDI =  
33 Peters et al. Delusions Inventory.

34 We have a binominal distribution of SPQ. Shapiro-Wilk test was performed and confirmed that the distribution of  
35 SPQ departed significantly from normality ( $W = 0.957, p < .05$ ). The PDI score is also not normally distributed  
36 (Shapiro-Wilk test,  $W = 0.938, p < .01$ ).

37 A linear mixed-effects model tested the effect of presentation order with condition and question as within-subject  
38 factors on ratings. Using Satterthwaite degrees of freedom, there was a significant main effect of order,  $F(1, 406) =$   
39  $7.25, p = .007$ , and no significant interactions. Holm-adjusted pairwise contrasts (order 1 vs. 2 within each condition  
40 × question) showed two small but significant differences: Agency (SA\_i\_speak) in the mismatch condition has higher  
41 ratings when the mismatch condition was presented before the match condition ( $t(295) = 2.07, p = .040$ ) and  
42 Ownership (SO\_my\_voice\_modified) has higher ratings when match condition was experienced before mismatch  
43 ( $t(295) = 2.06, p = .041$ ).

44 Post-hoc pairwise comparisons provided more nuanced insights into these group differences. For SPQ, while the  
45 overall ANOVA suggested minimal moderation, specific comparisons revealed that high-SPQ individuals showed  
46 enhanced sensitivity to certain experimental manipulations. Notably, the high-SPQ group demonstrated a significant  
47 difference between match and mismatch conditions for the SO\_my\_voice item ( $p = .010$ ) that was absent in controls  
48 ( $p = .660$ ). Similarly, for the SO\_my\_voice\_modified item, only the high-SPQ group showed a significant difference  
49 between match and veridical conditions ( $p = .037$ ), while controls showed no such differentiation. The PDI analysis  
50 revealed a different pattern of group moderation, particularly for the SO\_my\_voice\_modified item. Control  
51 participants maintained sensitivity to the experimental manipulation, showing a significant difference between  
52 match and mismatch conditions ( $p = .007$ ), while the high-PDI group showed no such differentiation ( $p = .450$ ). For  
53 other voice perception items, both groups generally showed consistent condition effects.

**Supplementary Table S3.** Median and mean ratings for each illusion questionnaire item by condition and schizotypy group. Participants rated each item using a scale from -3 ("not at all") to +3 ("completely"). The table presents the median (*Mdn*), mean (*M*) and standard deviation (*SD*) ratings for each item—Sense of Ownership (SO\_my\_voice, SO\_my\_voice\_modified) and Sense of Agency (SA\_i\_speak, SA\_i\_control)—across three conditions (veridical, stranger-match, stranger-mismatch), separately for control and high-schizotypy groups using both SPQ and PDI cutoffs.

|                          |                      | SPQ Cutoff |               |                 |               | PDI Cutoff |               |                 |               |
|--------------------------|----------------------|------------|---------------|-----------------|---------------|------------|---------------|-----------------|---------------|
|                          |                      | Control    |               | High schizotypy |               | Control    |               | High schizotypy |               |
| Condition                | Item                 | <i>Mdn</i> | <i>M (SD)</i> | <i>Mdn</i>      | <i>M (SD)</i> | <i>Mdn</i> | <i>M (SD)</i> | <i>Mdn</i>      | <i>M (SD)</i> |
| <i>Veridical</i>         |                      |            |               |                 |               |            |               |                 |               |
|                          | SO_my_voice          | 2.66       | 2.32 (0.99)   | 2.68            | 2.09 (1.36)   | 2.53       | 1.94 (1.37)   | 2.98            | 2.47 (0.90)   |
|                          | SO_my_voice_modified | 0.48       | -0.03 (1.95)  | -1.08           | -0.85 (1.65)  | 0.48       | 0.19 (1.68)   | -1.27           | -0.98 (1.84)  |
|                          | SA_i_speak           | 2.74       | 2.05 (1.59)   | 2.24            | 1.58 (1.81)   | 2.50       | 1.51 (2.10)   | 2.56            | 2.12 (1.17)   |
|                          | SA_i_control         | 1.86       | 1.36 (1.66)   | 1.16            | 1.05 (1.32)   | 1.26       | 0.86 (1.64)   | 1.66            | 1.55 (1.32)   |
| <i>Stranger-match</i>    |                      |            |               |                 |               |            |               |                 |               |
|                          | SO_my_voice          | -1.75      | -1.18 (1.85)  | -1.05           | -0.83 (1.78)  | -2.18      | -1.40 (1.79)  | -0.79           | -0.67 (1.78)  |
|                          | SO_my_voice_modified | -0.01      | -0.27 (1.77)  | 0.24            | 0.20 (1.79)   | 0.47       | 0.18 (1.81)   | -0.08           | -0.27 (1.75)  |
|                          | SA_i_speak           | -0.61      | -0.31 (1.91)  | 0.94            | 0.24 (2.08)   | -0.97      | -0.50 (2.03)  | 0.86            | 0.36 (1.89)   |
|                          | SA_i_control         | 0.34       | -0.02 (1.73)  | -0.70           | -0.46 (1.38)  | -0.23      | -0.28 (1.77)  | -0.23           | -0.17 (1.40)  |
| <i>Stranger-mismatch</i> |                      |            |               |                 |               |            |               |                 |               |
|                          | SO_my_voice          | -2.49      | -1.54 (1.75)  | -2.23           | -1.65 (1.36)  | -2.73      | -1.76 (1.64)  | -1.75           | -1.44 (1.52)  |
|                          | SO_my_voice_modified | -1.29      | -0.98 (1.79)  | -0.24           | -0.47 (1.88)  | -1.25      | -0.79 (1.89)  | -0.92           | -0.70 (1.82)  |
|                          | SA_i_speak           | -2.66      | -1.89 (1.45)  | -2.49           | -1.90 (1.53)  | -2.66      | -2.01 (1.54)  | -2.28           | -1.78 (1.43)  |
|                          | SA_i_control         | -0.11      | 0.09 (1.77)   | -0.57           | -0.52 (1.63)  | -0.60      | -0.28 (1.75)  | -0.18           | -0.12 (1.72)  |

**Supplementary Table S4.** Mixed-Design ANOVA Results with SPQ and PDI as Between-Subjects Factors. The table reports F-values, degrees of freedom (Greenhouse–Geisser corrected where indicated), p-values, and generalized eta squared ( $\eta^2G$ ) for each main effect and interaction in a mixed-design ANOVA. The within-subjects factors were Condition (veridical, stranger-match, stranger-mismatch) and Question (SO\_my\_voice, SO\_my\_voice\_modified, SA\_i\_speak, SA\_i\_control). Between-subjects groupings were based on either SPQ or PDI cutoff scores.

| Effect                              | SPQ Analysis |                           |          |           | PDI Analysis |                           |          |           |
|-------------------------------------|--------------|---------------------------|----------|-----------|--------------|---------------------------|----------|-----------|
|                                     | <i>F</i>     | df                        | <i>p</i> | $\eta^2G$ | <i>F</i>     | df                        | <i>p</i> | $\eta^2G$ |
| <b>Main Effects</b>                 |              |                           |          |           |              |                           |          |           |
| <b>Group</b>                        | 0.21         | 1, 58                     | 0.651    | < .01     | 1.26         | 1, 58                     | 0.266    | 0.005     |
| <b>Condition</b>                    | 110.38       | 1.79, 103.85 <sup>a</sup> | < .001   | 0.25      | 106.24       | 1.77, 102.71 <sup>a</sup> | < .001   | 0.26      |
| <b>Question</b>                     | 4.07         | 2.69, 156.02 <sup>a</sup> | 0.01     | 0.02      | 4.26         | 2.68, 155.54 <sup>a</sup> | 0.008    | 0.02      |
| <b>Interactions</b>                 |              |                           |          |           |              |                           |          |           |
| <b>Group × Condition</b>            | 2.38         | 1.79, 103.85 <sup>a</sup> | 0.103    | 0.01      | 0.11         | 1.77, 102.71 <sup>a</sup> | 0.871    | < .01     |
| <b>Group × Question</b>             | 0.78         | 2.69, 156.02 <sup>a</sup> | 0.496    | < .01     | 3.54         | 2.68, 155.54 <sup>a</sup> | 0.02     | 0.02      |
| <b>Condition × Question</b>         | 34.05        | 4.21, 244.18 <sup>a</sup> | < .001   | 0.15      | 34.3         | 4.23, 245.05 <sup>a</sup> | < .001   | 0.15      |
| <b>Group × Condition × Question</b> | 1.36         | 4.21, 244.18 <sup>a</sup> | 0.245    | 0.01      | 1.81         | 4.23, 245.05 <sup>a</sup> | 0.123    | 0.009     |

Note. <sup>a</sup>Greenhouse-Geisser corrected degrees of freedom due to sphericity violations.

71 **Supplementary Table S5.** Pairwise comparisons for illusion questionnaire items by condition and group  
72 (Bonferroni-corrected p-values).

| Question             | SPQ Group       | Match vs Mismatch | Match vs Veridical | Mismatch vs Veridical | PDI Group       | Match vs Mismatch | Match vs Veridical | Mismatch vs Veridical |
|----------------------|-----------------|-------------------|--------------------|-----------------------|-----------------|-------------------|--------------------|-----------------------|
| SA_i_control         | Control         | 1                 | 0.003              | 0.003                 | Control         | 1                 | 0.026              | 0.01                  |
|                      | High-schizotypy | 1                 | < .001             | 0.002                 | High-schizotypy | 1                 | < .001             | < .001                |
| SA_i_speak           | Control         | < .001            | < .001             | < .001                | Control         | 0.003             | < .001             | < .001                |
|                      | High-schizotypy | < .001            | 0.009              | < .001                | High-schizotypy | < .001            | < .001             | < .001                |
| SO_my_voice          | Control         | 0.66              | < .001             | < .001                | Control         | 0.2               | < .001             | < .001                |
|                      | High-schizotypy | 0.01              | < .001             | < .001                | High-schizotypy | 0.079             | < .001             | < .001                |
| SO_my_voice_modified | Control         | 0.077             | 1                  | 0.127                 | Control         | 0.007             | 1                  | 0.119                 |
|                      | High-schizotypy | 0.075             | 0.037              | 1                     | High-schizotypy | 0.45              | 0.29               | 1                     |

73 Note. Significant differences ( $p < .05$ ) indicate condition effects within each group.

74 **Supplementary Table S6.** Mean F0 (Hz) pre and post condition, and F0 semitone shift by condition and schizotypy  
75 group.  
76 For each stranger condition (match and mismatch), geometric mean F0 (in Hz) and standard deviations before and  
77 after each condition, as well as the semitone shift (positive values indicate shift toward the stranger voice) were  
78 reported. Results are shown for all participants and split by schizotypy group using both SPQ and PDI cutoffs.

| Condition         | Group            | Pre in Hz (SD) | Post in Hz (SD) | Semitone-Shift (SD) |
|-------------------|------------------|----------------|-----------------|---------------------|
| <b>SPQ Cutoff</b> |                  |                |                 |                     |
| Match             | All participants | 185.41 (52.46) | 200.25 (55.77)  | 1.35 (0.78)         |
|                   | control          | 184.24 (47.55) | 198.33 (50.16)  | 1.29 (0.80)         |
|                   | high-schizotypy  | 186.74 (58.42) | 202.44 (62.44)  | 1.42 (0.78)         |
| Mismatch          | All participants | 194.94 (52.73) | 196.95 (54.23)  | 0.15 (1.08)         |
|                   | control          | 194.22 (49.19) | 196.64 (47.66)  | 0.27 (1.06)         |
|                   | high-schizotypy  | 195.75 (57.41) | 197.31 (61.79)  | 0.02 (1.11)         |
| <b>PDI Cutoff</b> |                  |                |                 |                     |
| Match             | control          | 185.13 (51.89) | 199.36 (54.62)  | 1.30 (0.84)         |
|                   | high-schizotypy  | 185.66 (53.84) | 201.08 (57.73)  | 1.41 (0.74)         |
| Mismatch          | control          | 195.06 (54.44) | 198.45 (52.82)  | 0.36 (1.08)         |
|                   | high-schizotypy  | 194.82 (51.97) | 195.55 (56.35)  | -0.04 (1.07)        |

79

80 **Supplementary Figure S7.** N1 amplitude comparisons between control and high-schizotypy groups across  
81 experimental conditions.  
82 (A) SPQ cutoff and (B) PDI cutoff. Boxplots show N1 amplitudes ( $\mu V$ ) for each condition (veridical\_speak,  
83 veridical\_listen, stranger\_match, stranger\_mis, stranger\_listen) separately by group. Horizontal lines represent  
84 means, with p-values from independent-samples t-tests shown above each pair (both uncorrected and Bonferroni-  
85 adjusted).

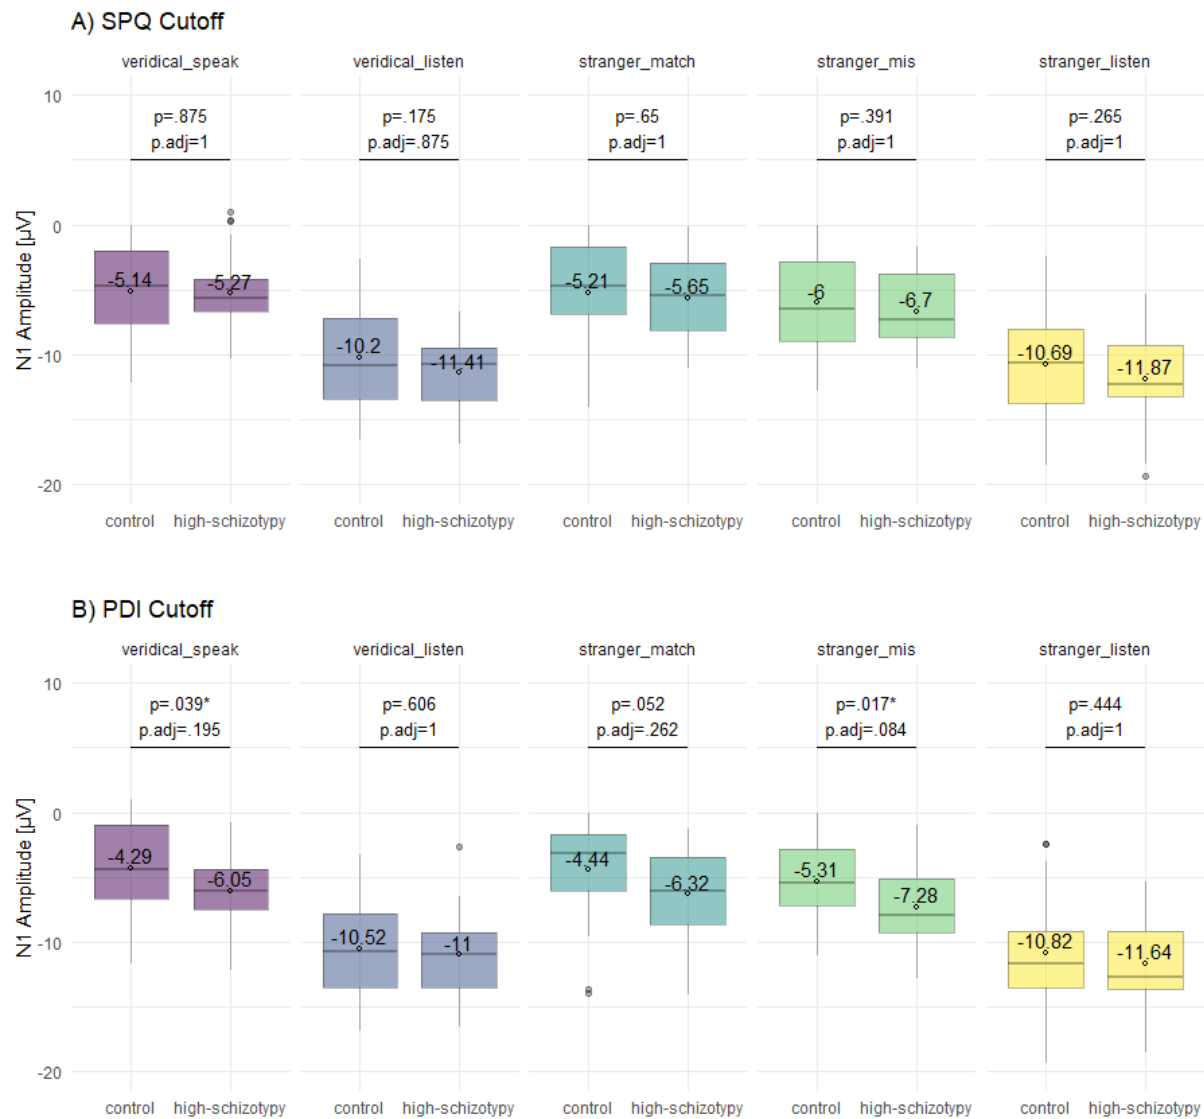

86 Note. Pairwise t-tests corrected with Bonferroni adjustment for multiple comparisons.

87 In the PDI-based grouping, high-schizotypy participants consistently showed more negative N1 amplitudes than  
 88 controls across all speaking conditions, with the largest difference observed in the stranger-mismatch speak  
 89 condition ( $-7.28 \mu\text{V}$  vs.  $-5.31 \mu\text{V}$ ). The SPQ-based grouping showed a similar but slightly less pronounced trend. A  
 90 repeated measures ANOVA with condition as a within-subjects factor and group (SPQ-based grouping) as a between-  
 91 subjects factor revealed a significant main effect of condition,  $F(4, 232) = 101.26, p < .001, \eta^2_g = .36$ , indicating that  
 92 N1 amplitude differed significantly across the five experimental conditions. There was no significant main effect of  
 93 group ( $F(1, 58) = 0.92, p = .342, \eta^2_g = .01$ ) and no condition  $\times$  group interaction ( $F(4, 232) = 0.62, p = .647, \eta^2_g = .003$ ).  
 94 Independent samples t-tests comparing control and high-schizotypy groups within each condition revealed no  
 95 significant differences after Bonferroni correction for multiple comparisons (all  $p > .05$ ). Using PDI as the grouping  
 96 criterion, the repeated measures ANOVA showed a marginal main effect of group,  $F(1, 58) = 3.41, p = .070, \eta^2_g = .04$ .  
 97 The condition  $\times$  group interaction remained non-significant,  $F(4, 232) = 1.35, p = .254, \eta^2_g = .008$ . Post-hoc  
 98 comparisons revealed different patterns compared to SPQ grouping. While no comparisons reached significance after  
 99 Bonferroni correction, several showed notable trends: difference between control and high-schizotypy group in the  
 100 mismatch condition approached significance. High-PDI participants consistently showed more negative N1  
 101 amplitudes across speaking conditions compared to controls, while listening conditions showed minimal group  
 102 differences.

103 **Supplementary Figure S8.** ERP waveforms and N1 topographies for control and high-SPQ groups across conditions.  
 104 (a–b) ERP waveforms for the veridical conditions (veridical\_speak: purple, dashed vs. veridical\_listen: teal, solid) are  
 105 shown for the control group (a) and high-SPQ group (b).  
 106 (c–d) ERP waveforms for the stranger conditions (stranger\_match: purple, dashed, stranger\_mismatch: blue, dotted,  
 107 and stranger\_listen: brown, solid) are shown for the control group (c) and high-SPQ group (d).  
 108

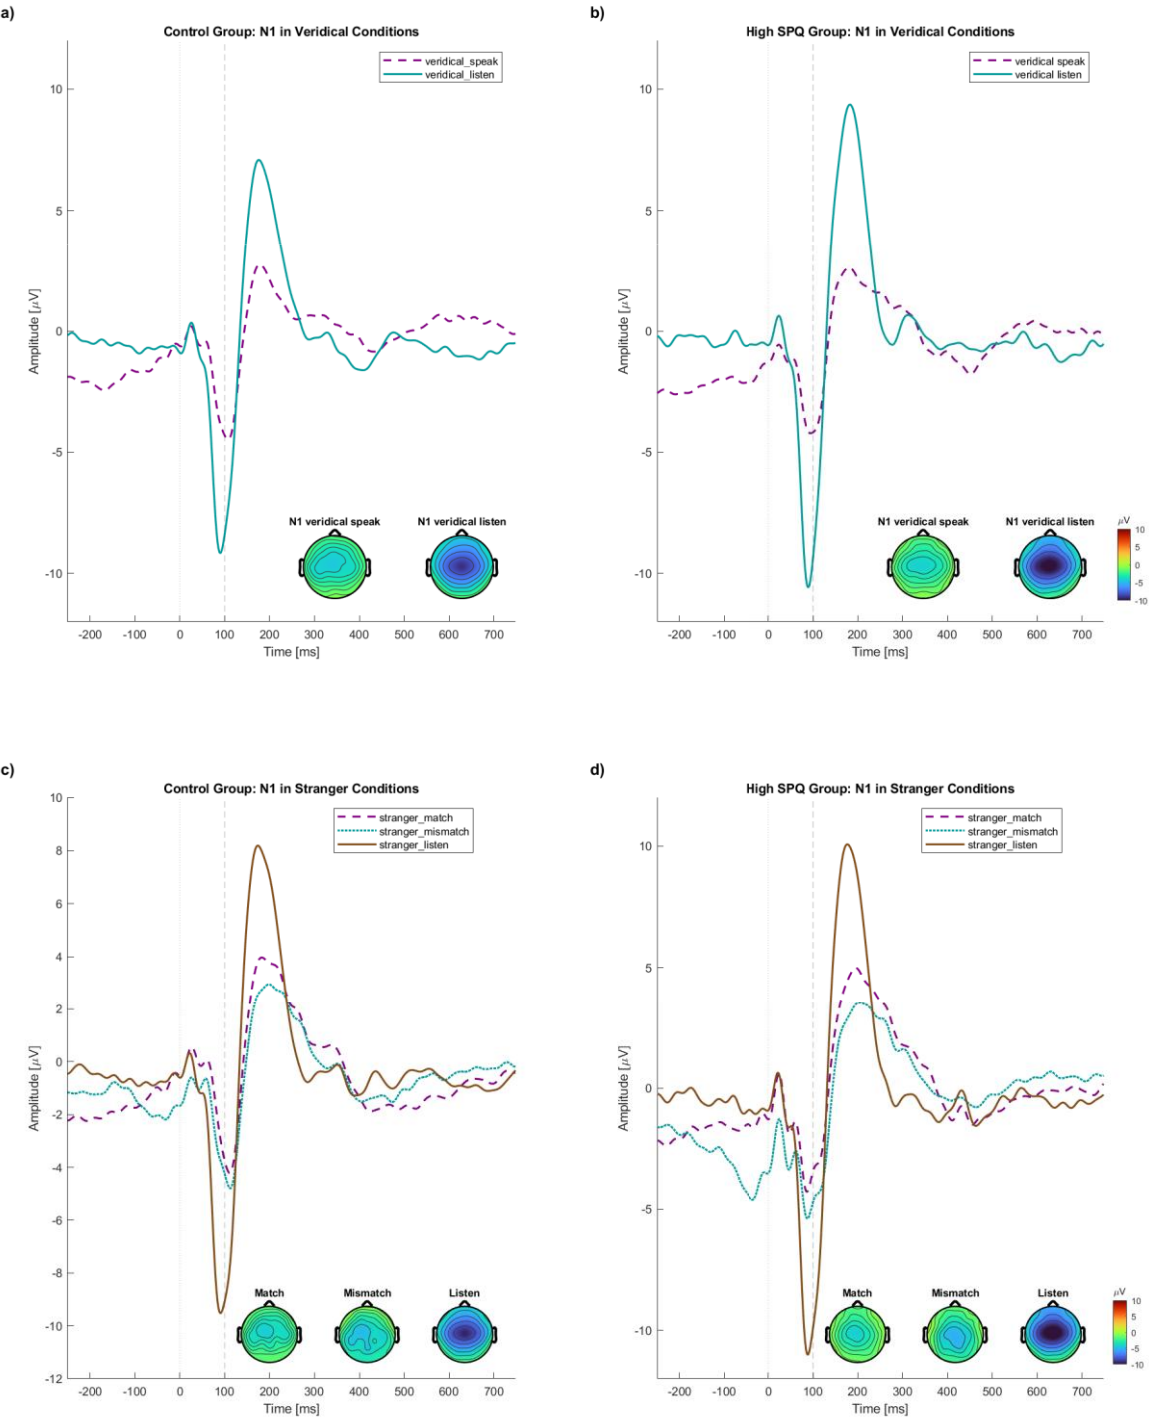

111 **Supplementary Figure S9.** ERP waveforms and N1 topographies for control and high-PDI groups across conditions.  
112 (a–b) ERP waveforms for the veridical conditions (veridical\_speak: purple, dashed vs. veridical\_listen: teal, solid) are  
113 shown for the control group (a) and high-PDI group (b).  
114 (c–d) ERP waveforms for the stranger conditions (stranger\_match: purple, dashed, stranger\_mismatch: blue, dotted,  
115 and stranger\_listen: brown, solid) are shown for the control group (c) and high-PDI group (d).

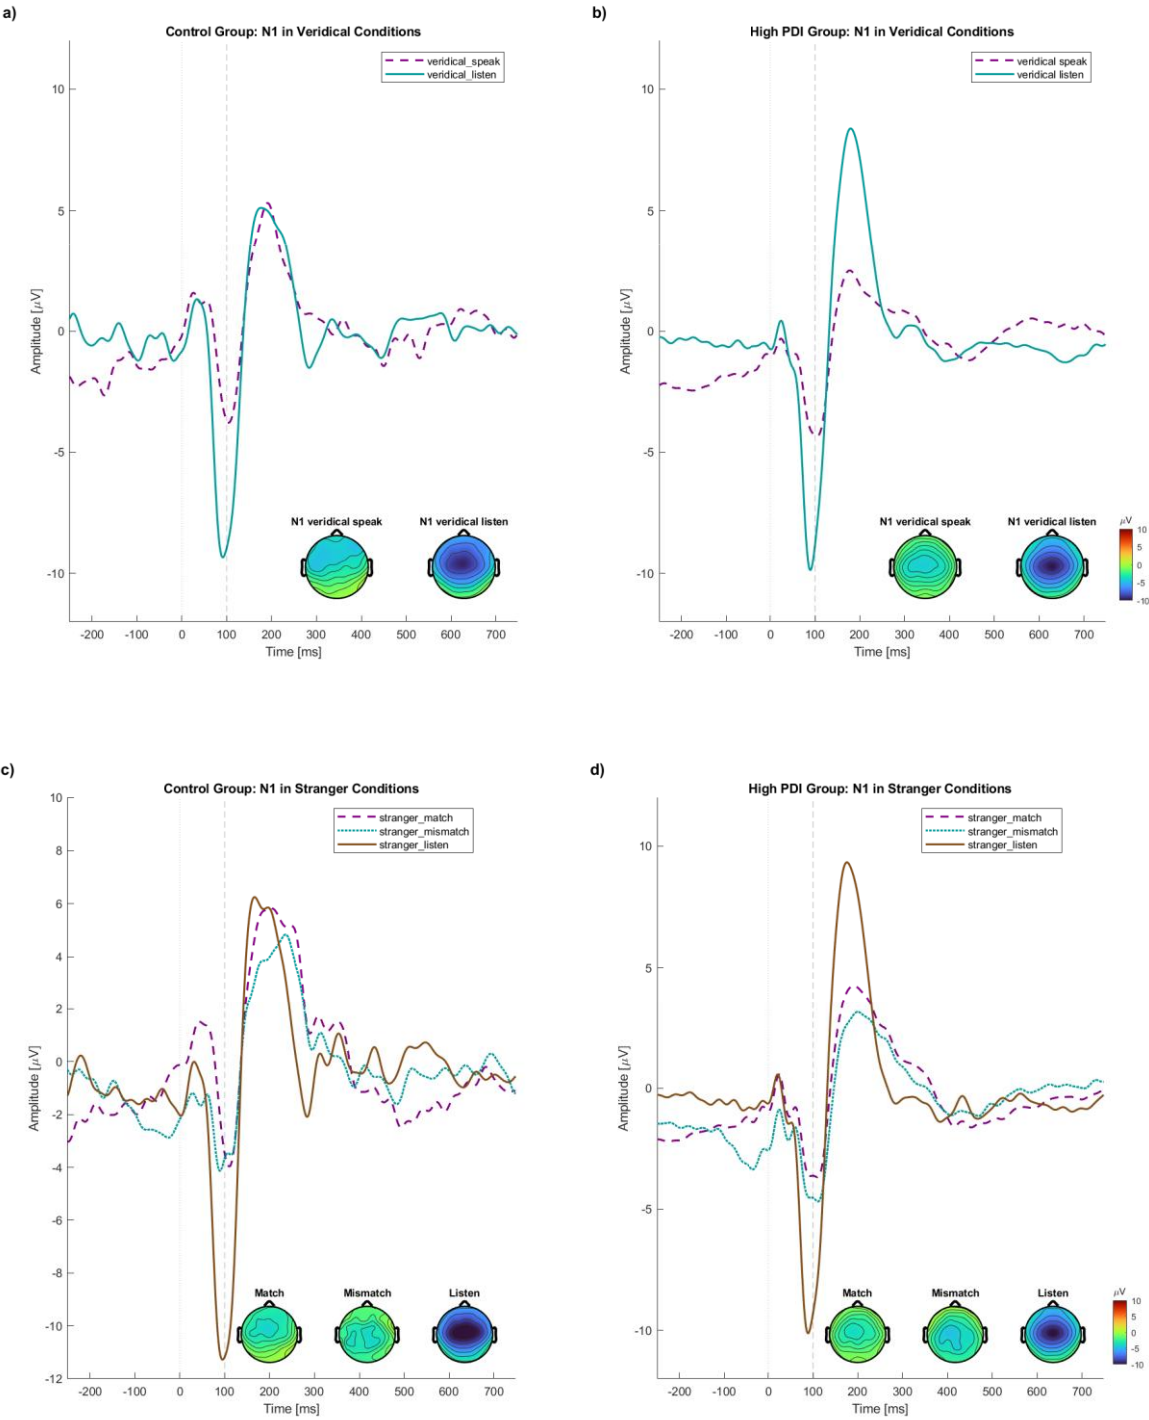

Supplement: Supplementary file [file c960c34e557a39d013405396.pdf]
